# Supplementary material for: A field study assessing the health care needs of senior citizens in Upper Mustang, Nepal
Source: Research Square preprint supplement (doi:10.21203/rs.3.rs-8818362/v1), 2026-02-23
Supplement: Supplementary file 1 [file fd2ad066e4bb13a066c6910e.docx]

**Senior Citizen Care Research Project (ज्येष्ठ नागरीक स्याहार अनुसन्धान परियोजना)**

**Field Study Questionnaire, Lo Manthang (लो मान्थाङको स्थलगत अध्ययन प्रश्नावली)**

**Id No.:** LRM-_______-______ **Name:** ………………………

WARD NO……………… Contact No. ………………..

| **S.N** | **Items** | **Answer with coding (उत्तर र कोडहरू)** |
| --- | --- | --- |
| **A. Demographic Information**  **जनसांख्यिकक सूचना** | | |
| A1. | Age उमेर | ……………years बर्ष |
|  | Sex लिँग | - a. Male पुरुष - b. Female महिला - Other…………… |
| A2. | Marital status वैवाहिक अवस्था | - a. Married विवाहित - b. Unmarried अविवाहित - c. Divorced पारपाचुके भएको (ཁ་བྲལ་བ།) - d. Widow एकल महिला वा एकल पुरुष (ཡུགས་མོ།) |
| A3. | Living arrangement  वसाईको अबस्था | - a. With spouse पति/ पत्नीसँग - b. With son/daughter-in-law छोरा/बुहारीसँग - c. With daughter/son-in-law छोरी/ज्वाइँसँग - d. Son/daughter's absentee छोरा वा छोरी घरमा नभएको - e. All alone एक्लै - f. With the neighbor’s help छिमेकीको सहायतामा |
| **B. Social Situation** | | |
| B1. | Level of education शिक्षाको तह | - a. Illiterate निरक्षरशिक्षीत - b. Literate but informal education साक्षरतर अनौपचारिक शिक्षा - c. Class completed: (कक्षा पास गरेको)................. - Other …………………… |
| B2. | Occupation पेशा | - a. Farmer किसान - b. Animal husbandry पशुपालन - c. None केहि पनी नभएको - Other…………………….. |
| **C. Living Comfort**  **बसाइको सहजता** | | |
| C1. | Light facility in house  घरमा बत्तिको सुविधा | - a. Electricity बिद्युत - b. Solar सौर्य बत्ती - c. Traditional lamp परम्परागत टुकिबत्ति |
| C2. | Primary means of cooking  खाना पकाउने इन्धन | - a. Firewood दाउरा - b. LPG ग्यास - c. Electricity बिद्युत - d. Other अन्य…………………… |
| C3. | Toilet type सौचाल का प्रकार | - a. No toilet सौचालय नभएको - b. Concrete toilet पक्की सौचालय - c. Public toilet सार्वजनिक सौचालय - d. Traditional pit परम्परागतखाल्टे चर्पी |
| C4. | Winter stay जाडोयामको बसाइ | - a. Village गाउँ - b. Lowland बेँसी |
| C5 | Do you live in a house that is accessible and comfortable for your needs(e.g. bathroom, stairs, design etc)  तपाई बस्ने घर के तपाइँ बस्ने घरको स्नानकक्ष, भर्याङ र बनावट तपाइँको आवश्यकता अनुसार प्रयोग गर्न सजिलो हुने खालको छ ? | - a) Yes छैन् - b) No छैन - c) Somewhat केही हदसम्म |
|  | | |
| **D** | **General Health Status**  **Group of compulsory questions**  **(स्वास्थ्सम्बन्धी अनिवार्य प्रश्नहरू)** | **Answer with coding** |
| **D1.** | **Quality of life (गुणस्तरीय जीवन)**  How do you feel?  तपाइँलाइ कस्तो महशुस हुन्छ ?    What makes you sad?  तपाइँलाइ केले दुखित बनाउँछ ?        What makes you happy?  तपाइँलाइ केले खुशी बनाउँछ ?        What do you really miss?  तपाइँले धेरै जसो केको सम्झना आउँछ ? | - Healthy (स्वस्थ) - Week (कमजोर) - Depressed (चिन्ताग्रस्त) - Neglected (उपेक्षित) - Abused (दुर्व्यवहार भोगेको) - Other (अन्य)……………………………………     ……………………………………………………  ………………………………………………………  ……………………………………………………….    ………………………………………………………  ………………………………………………………  ……………………………………………………….    ………………………………………………………  ………………………………………………………  ………………………………………………………. |
| **D2.** | **Activity of Daily Living (ADL)**  **दैनिक जीवनको सक्रियता** | **Answer by family assessment**  1: eat independently आफै खान सक्ने   - YES सक्ने - NO नसक्ने   2: get up and move independently उठ्न र चल्न सक्ने   - YES सक्ने - NO नसक्ने   3: get dressed alone आफै लुगा लगाउन सक्ने   - YES सक्ने - NO नसक्ने   4: get to toilet alone सौचालय जान सक्ने   - YES सक्ने - NO नसक्ने   5: sanitary hygiene granted (wash) सरसफाई गर्न सक्ने   - YES सक्ने - NO नसक्ने |
| **D3.** | **Disability**  How do you feel your body?  तपाईले आफ्नो शरिरमा कस्तो महसूस गर्नुहुन्छ?                  Do you feel disabled?  के तपाई अशक्त महसुस गर्नुहुन्छ?  Do you have incontinence for urine?  के तपाईंलाई दिसा-पिसाब चुहिने समस्या छ?  Do you remember what you did yesterday?  के तपाईलाई हिजो गरेको कुराको सम्झना छ? | a. sight दृष्टि:   - impaired कमजोर - blind अन्धो - Normal सामान्य   b. Speech बोली:   - impaired कमजोर - aphasis बोल्न नसक्ने - Normal सामान्य   c. hearing कान:   - impaired कमजोर - deaf नसुन्ने - Normal सामान्य   d. Eating खाने:   - swallowing impaired निल्न गाह्रो - vomiting खाएको बान्ता - Normal सामान्य   e. Paralyzed पक्षाघात भएको:   - leg खुट्टा - arm हात - total पुरै शरीर - Not Paralyzed पक्षघात भएको छैन   f. Incontinence दिसा-पिसाप रोक्न समस्या:   - bladder पिसाप - bowel दिसा - both (दुवै) - Not at all समस्या छैन   g. mental disturbance मन अशांत हुने:   - forgetful बिर्सने - confused द्विविधा हुने - dementia स्मरण शक्तिमा ह्रास - Other अन्य:…………………………………………….      - Yes गर्छु - No गर्दिन - Somehow.. अलिअलि - Yes छ - No छैन - Somehow.. अलिअलि - Yes छ - No छैन - Somehow अलिअलि |
| **D4.** | **Chronic Illness**  **दिर्घरोग**  *Measure Blood pressure / pulse*  *रक्तचाप र नाडी जाँच्नुहोस्*                    Do you feel healthy?  तपाई आफुलाई स्वस्थ महसुस गर्नुहुन्छ? (Please make separate rows for all questions below)    Do you have any health related problems?  तपाई लाई स्वास्थ्य सम्बन्धी केही समस्या छन्?  Do you take any medicaments?  तपाईले कुनै औषधीहरू सेवन गर्नुहुन्छ?    What bothers you the most?  तपाईलाई के कुराले धेरै सताउँछ? | a. hypertension  उच्च रक्तचाप  *Blood Pressure रक्तचाप……….*  *Pulse नाडी……* Therapy हाल कुनैं चलिरहेको उपचार ………………………  MUAC:.......................  b. diabetes मधुमेह (सुगर, चिनि रोग)  Yes छ  No छैन  If Yes, Therapy यदि छ भने उपचार…………………….  c. breathing: श्वास्थ प्रश्वास   - Coughखोकि - short of breath श्वा सवा हुने - Normal सामान्य   d. heart pain मुटु दुख्ने:   - attack आघात - chronic दीर्घ समस्या - Normal सामान्य   e. abdominal pain पेट दुख्ने:   - stomach आमाशय - general पुरै पेट - Normal सामान्य   f. rheumatic pain joints जोर्नी दुख्ने:   - limbs जोर्नी/हात खुट्टा - Back मेरुदण्ड (पिठ्यु) - Normal सामान्य   g. digestive disorder पाचन समस्या:   - vomit बान्ता - diarrhoea पखाला - Constipation कब्जियत - Normal सामान्य   h. Worst problem सबै भन्दा नराम्रो समस्या……………………………………..  i. Other complaint: अन्य समस्या………………………………….    Do you feel heathly?   - Yes - No - Somehow   ……………………………………………………………………………………………………………………………   - Yes गर्छु - No गर्दिन - If Yes, which medicines? औषधि लिनु हुन्छ भने के को औषधि लिनु हुन्छ ?   ……………………………………………………………………………………………………………………………………………………………………………………… |
| **D5.** | **Nutrition**  **पोषण**  Do you have a problem with eating, swallowing or digesting? के तपाईंलाई खान, निल्न, वा पाचनमा समस्या छ?   - YES - NO - SOMEWHAT | Self-care आफ्नो-स्याहार गर्न   - Yes छ - No छैन   buy food खानेकुरा किनमेल गर्न   - Yes छ - No छैन   not enough food / hungry खानाको अभाव/भोकै बस्नेरहनु   - Yes छ - No छैन   intolerance of food कुनैं खाना खाएपछि संचो नहुने समस्या   - Yes छ - No छैन   Other…अन्य……………………………………… |
| **D6.** | **Any emergency last year?**  **गएको वर्ष तपाई लाई केहि आपतकालीन समस्या भएको थियो?** | - a. Yes थियो - b. No थिएन |

| **D7.** | If yes, what happened?  यदि थियो भने के भएको थियो? | ………………………………………………………  …………………………………………………………………………………………………. |
| --- | --- | --- |
| **D8.** | Further Comments  तपाइलाइ थप केही भन्नुछ? | …………………………………………………….. |
| **E** | **LIFESTYLE FACTORS** |  |
| **E1** | Do you consume alcohol or smoke? तपाई मादक पदार्थ(जाँड, रक्सी आदी) वा धुम्रपान(चुरोट, बिडि, हुक्का आदी) सेवन गर्नुहुन्छ? | - a) Yes, regularly गर्छु, नियमित रूपमा - b) Yes, occasionally गर्छु, कहिलेकाहीँ - c)Quitted छोडेको - c) No गर्दिन |
| **E2** | Do you engage in activities that help you relax or relieve stress?  आराम लिन वा तनाव कम गर्न तपाई कुनै कार्य गर्नुहुन्छ? | - a) Yes गर्छु - b) No गर्दिन - If yes please specify ……………… |
| **E3** | Have you received any vaccinations in the last year?(Eg. Flu, Pneumonia)  बिगत एक बर्षमा तपाईले कुनै खोप लिनुभएको छ? | - a) Yes छ - b) No छैन |
| **E4** | Are there any barriers preventing you from accessing healthcare services?  स्वास्थ्य सेवा को पहुँचमा तपाईलाई केही बाधा अड्चनले रोकेका छन? | - a) Yes, transportation छ, यातायात ले - b) Yes, cost छ, पैसा ले - c) Other अन्य ……………………………………………………………………………………………………………………………………………………………………………………………. |

| **Overall Conclusion** (assessed by Project Manager)  **NEED FOR CARE a. Yes** b. NoInformed consent to questionnaire? a. Yes  Agree with Visit of Senior Caregiver? a. Yes  b. No |
| --- |
| **Interviewer:…………………… Date:……………………. Signature:………………….** |
